1 **Assaying *Chlamydia pneumoniae* persistence in monocyte-derived macrophages**  
2 **identifies schisandrin lignans as phenotypic switchers**

3

4 Eveliina Taavitsainen<sup>a</sup>, Maarit Kortesoja<sup>a</sup>, Leena Hanski<sup>a\*</sup>

5

6 <sup>a</sup>Drug Research Program, Division of Pharmaceutical Biosciences, Faculty of Pharmacy, University of  
7 Helsinki, P.O. Box 56, FI-00014 University of Helsinki, Finland

8

9

10

11

12

13

14 Running title: *C. pneumoniae* resuscitation by schisandrin lignans

15

16 \*Corresponding author contact details:

17 Leena Hanski, Faculty of Pharmacy, P.O. Box 56, FI-00014 University of Helsinki, Helsinki, Finland;

18 Phone: +358 29 415 9164 email: [leena.hanski@helsinki.fi](mailto:leena.hanski@helsinki.fi)

19 ET and MK contributed equally for the manuscript

20

21

22

23 **Abstract**

24 Antibiotic-tolerant persister bacteria involve frequent treatment failures, relapsing infections and the need  
25 for extended antibiotic treatment. Taking persisters into account in susceptibility assays is thus an essential  
26 success factor in antibacterial drug discovery. The virulence of the obligate intracellular bacterium  
27 *Chlamydia pneumoniae* is tightly linked to its propensity for persistence, but current susceptibility  
28 screening on this gram-negative respiratory pathogen relies on permissive epithelial cells. To establish an  
29 improved antichlamydial susceptibility assay allowing the analysis of both actively growing and persister  
30 bacteria, we studied *C. pneumoniae* clinical isolate CV-6 infection kinetics in THP-1 macrophages by qPCR  
31 and quantitative culture. Indicated by the steady increase of chlamydial genome copy numbers and  
32 infectious progeny as well as the failure of azithromycin to eradicate the intracellular forms of the  
33 bacterium, the macrophages were found to harbor a subpopulation of persister *C. pneumoniae* cells. The  
34 potential of the assay for the discovery of anti-persister molecules against intracellular bacteria was  
35 demonstrated by the identification of the differential effects of two dibenzocyclooctadiene lignans on *C.*  
36 *pneumoniae* infection. While schisandrin reverted *C. pneumoniae* persistence and promoted productive  
37 infection, schisandrin C was superior to azithromycin in eradicating the *C. pneumoniae* infection. The  
38 phenotypic switch was associated with the suppression of cellular glutathione pools, implying that targeting  
39 glutathione homeostasis may provide a novel means for intracellular bacteria resuscitation. In conclusion,  
40 these data highlight the value of macrophages over permissive cell lines in anti-persister agent discovery on  
41 intracellular bacteria and targeting host cell redox status to fight persistent infections.

42

43

44 Keywords: persistent infection, antibiotic persistence, dormancy, phenotypic switch, glutathione,  
45 antibacterial agent

46

47

48

49

50

51

52

## 53 Background

54 In the course of evolution, bacteria have developed various means for protecting themselves from  
55 unfavorable conditions. Described as a reversible dormant phenotype, persistence has been acknowledged  
56 as one major survival strategy of bacteria<sup>1</sup>. Bacterial persistence is considered major cause of antibiotic  
57 treatment failures and relapsing infections and it also contributes to the rise of antibiotic resistance<sup>2</sup>.  
58 Owing to redundant mechanisms, these phenotypical variants are able to survive under antibiotic pressure  
59 and revert back to metabolically more active phenotype when stressful conditions are cleared off.

60 In clinical settings, bacterial dormancy is associated with hard-to-treat infections via two mechanistically  
61 overlapping phenomena, persistent infections evading host immune responses and antibiotic persistence  
62 defined based on the presence of drug-tolerant subpopulations of bacteria. Both of these features are  
63 typical to infections caused by *Chlamydia pneumoniae*, a gram-negative obligate intracellular human  
64 pathogen that causes respiratory infections from dry cough to pneumonia. While a majority of *C.*  
65 *pneumoniae* infections are subclinical, nearly everyone getting infected during their lifetime, the bacterium  
66 is also responsible for 5-10% of community-acquired pneumonia cases worldwide<sup>3,4</sup>. *C. pneumoniae* has a  
67 unique biphasic development cycle, where the bacteria switch between an infectious form elementary  
68 body (EB) and a non-infectious metabolically active reticulate body (RB)<sup>5</sup>. The acute phase may also be  
69 followed by a persistent infection<sup>6</sup>, occurring spontaneously in monocytes and macrophages<sup>4,7</sup>. A  
70 morphological hallmark of the persistent phenotype is the emergence of abnormal reticulate bodies with  
71 low metabolic activity and replication<sup>6,8</sup>. However, cellular and molecular mechanisms driving chlamydial  
72 persistent infections are considered heterogeneous, redundant and not yet fully understood<sup>9,10</sup>.

73 Besides the acute respiratory illnesses, *C. pneumoniae* has been related to many chronic inflammatory  
74 diseases, such as atherosclerosis and asthma exacerbation<sup>11,12</sup>. The ability of *C. pneumoniae* to persist in  
75 infected cell populations forms the basis for the hypotheses on these disease connections, and monocytes  
76 and macrophages have a main role in the initiation of the chlamydial persistence<sup>4,6</sup>.

77 Both *in vitro* and *in vivo*, the outcome of *C. pneumoniae* infection in monocytes and macrophages depends  
78 on the bacterial strain and host cell origin<sup>4,13,14</sup>. *C. pneumoniae* is able to infect and survive inside alveolar  
79 and PBMC-derived macrophages<sup>13,15,16</sup>. In these cells, *C. pneumoniae* has been described to form small and  
80 non-mature or persistent-like inclusions and produce not at all or significantly lower yields of infectious  
81 progenies than in permissive epithelial cells.<sup>7</sup> However, the previous studies reporting limited replication  
82 of *C. pneumoniae* in macrophage models, detection of replication has been made solely by quantitative  
83 culture<sup>17,18</sup>. These studies may reliably evaluate the presence of a productive infection but limitation in  
84 detection method leaves intracellular replication and persistent forms of the bacterium beyond notice.

85 To date, a variety of anti-persister molecules have been described against both gram-positive and gram-  
86 negative human pathogens, major strategies involving direct eradication of the metabolically quiescent  
87 cells by eg. Membrane-active compounds, bacterial resuscitation by boosting energy metabolism and  
88 application of combination therapies <sup>2</sup>. According to current consensus, taking persister bacteria into  
89 account is a critical success factor in antibacterial drug discovery and this paradigm shift has brought  
90 stationary phase cultures, bacterial biofilms and other persister-enriched culture systems as essential tools  
91 in this respect. Despite such progress, susceptibility testing and antibacterial discovery platforms for  
92 intracellular bacteria still mostly rely on conventional methodology and models on actively replicating  
93 bacteria. Regarding *C. pneumoniae*, only a few membrane-active agents capable of affecting EB infectivity  
94 independent of metabolic activity have been described <sup>19, 20</sup> and to date, no agents capable of affecting the  
95 persistent intracellular forms of the bacterium have been described. Furthermore, current standard  
96 methods for antichlamydial susceptibility testing are based solely on permissive epithelial cells and involve  
97 the suppression of host cell responses by cycloheximide treatment <sup>21, 22</sup>.

98 To establish an antichlamydial susceptibility assay allowing the simultaneous analysis of actively growing  
99 and persistent bacteria, we studied *C. pneumoniae* infection in THP-1 macrophages. The model was found  
100 to harbor a mixed infection, involving simultaneously present populations of replicating and persister  
101 bacteria and its potential in the discovery of antichlamydial agents targeting also persistent bacteria was  
102 demonstrated by the identification of schisandrin and schisandrin C, two dibenzocyclooctadiene lignans  
103 with antichlamydial activities that are qualitatively distinct from each other and the reference antibiotic  
104 azithromycin.

105

## 106 **Materials and Methods**

### 107 **Compounds**

108 Schisandrin was obtained from Sigma-Aldrich, St. Louis, MO, USA and schisandrin B and schisandrin C were  
109 purchased from Fine Tech Industries, London, UK. The lignans, as well as azithromycin (BioWhittaker,  
110 Lonza, Basel, Switzerland) used as a reference antibiotic were dissolved in dimethyl sulfoxide (DMSO) and  
111 diluted in cell culture media at indicated concentrations.

112

### 113 **Cell culture**

114 All cell cultures were maintained at 37 °C, 5 % CO<sub>2</sub> and 95 % air humidity.

115 THP-1 cells (ATCC TIB-202) were maintained in RPMI 1640 Dutch edition medium (Gibco, Invitrogen,  
116 Thermo Fisher Scientific, Massachusetts, USA) supplemented with 10 % FBS (BioWhittaker, Lonza, Basel,  
117 Switzerland), 2 mM L-glutamine (BioWhittaker, Lonza, Basel, Switzerland), 0.05 mM merkaptoethanol  
118 (Gibco, Invitrogen, Thermo Fisher) and 20 µg/ml gentamicin (Sigma-Aldrich, St. Louis, MO, USA). For  
119 differentiation into macrophage-like cells, THP-1 cells were incubated for 48 – 72 h with 0.16 µg/ml  
120 phorbol-12-myristate-13-acetate (PMA, Sigma-Aldrich, St. Louis, MO, USA). Human HL cells <sup>23</sup> were  
121 maintained in RPMI 1640 (BioWhittaker, Lonza, Basel, Switzerland) supplemented with 7.5 % FBS, 2 mM L-  
122 glutamine and 20 µg/ml gentamicin. When seeding HL cells into well plates, an overnight incubation was  
123 applied prior to the experiment.

124

## 125 **Infections**

126 For qPCR and infectious progeny experiments, The cells were seeded into 24-well plates (THP-1 monocytes  
127 and HL cells at a density of 4 x 10<sup>5</sup> cell per well, THP-1 macrophages 3.5 x 10<sup>5</sup> cell per well) and infected  
128 with *C. pneumoniae* (strain CV-6, obtained from professor Matthias Maass, Paracelsus Medical  
129 University, Salzburg, Austria, propagated as previously described <sup>24</sup>). Cell monolayers were centrifuged  
130 at 550g for 1 h and incubated 1 h in 37 °C. Then, fresh medium or medium with compounds was added  
131 and the cultures were incubated from 24 to 144 h. To determine effect of GSH on *C. pneumoniae*  
132 infection, 2 mM GSH ethyl ester was added to the infected cultures at 2, 24 or 48 h post infection. For HL  
133 cell infections, cell culture medium was supplemented with 1 µg/ml of cycloheximide (CHX, Sigma-  
134 Aldrich, St. Louis, MO, USA).

135

## 136 **Quantitative PCR**

137 DNA from cell cultures was extracted with a GeneJet Genomic DNA purification kit (Thermo Fisher  
138 Scientific, Massachusetts, USA) according to the manufacturer's instructions for mammalian cells. The DNA  
139 concentration in samples was measured with Multiskan Sky Microplate spectrophotometer by µDrop  
140 Plate and the DNA was stored at -20 °C until use. An established qPCR method on *C. pneumoniae* ompA  
141 gene <sup>25</sup> was applied to quantify *C. pneumoniae* genome copy numbers. Using Step One plus Real-Time PCR  
142 system (Thermo Fisher Scientific, Massachusetts, USA). The primers were selected for qPCR run as follows:  
143 forward primer, VD<sub>4</sub>F (5'-TCC GCA as TTG CTC AGC C-3') and reverse primer, VD<sub>4</sub>R (5'-AAA CAA TTT GCA  
144 TGA AGT CTG AGA A-3'). The reactions were prepared in 96-well MicroAmp optical plate by adding 20 ng  
145 of extracted DNA to 10 µl of master mix to 20 µl qPCR reaction. Detection was performed with Step One

146 plus Real-Time PCR system by using the manufacturer's standard protocol. Conditions in thermal cycle were  
147 95 °C for 20 s and 40 cycles of 95 °C for 3 s and 60 °C for 30 s.

148

149

#### 150 **Infectious progeny assay**

151 The EBs were harvested from infected THP-1 macrophages at various time points (72 – 144 h) post  
152 infection by collecting the culture supernatants, centrifuging them at 21 000 rpm for 1 h in 4 °C and  
153 resuspending the pellets with 0.2 ml of fresh cold media. Monolayer cells from the same samples were  
154 scraped to 0.2 ml of fresh cold media. All samples were stored in -80 °C.

155 The bacterial progeny in the samples was quantified by inoculating them on HL monolayers with CHX.  
156 After infection, fresh medium with CHX was added and cells were incubated for 70 h. Then, cells were  
157 fixed and stained with a genus-specific anti-LPS antibody (Pathfinder, Bio-rad, California, USA).  
158 Chlamydial titers were determined based on the inclusion counts observed with fluorescence  
159 microscope.

160

#### 161 **Intracellular ROS detection assay**

162 THP-1 macrophages in 96-well plate ( $6 \times 10^4$  cells/well) were subjected to an infection by *C. pneumoniae*,  
163 treatment with the schisandrin lignans or a combination of these two, using a culture medium without  
164 merkaptoethanol. In experiments with 1 – 4 h exposure, the cells were preloaded with 20 μM DCFH-DA  
165 (Sigma-Aldrich, St. Louis, MO, USA) for 30 min and washed with PBS prior to lignan administration. After 24  
166 – 72 h exposures, cells were washed once with PBS, loaded with DCFH-DA for 30 min, washed with PBS and  
167 incubated for further 3 hours. After that, fluorescence was recorded at 503/523 nm with Varioskan Lux  
168 plate reader.

169

#### 170 **Glutathione quantification assay**

171 The intracellular GSH levels of THP-1 macrophages after *C. pneumoniae* infection, lignan treatment or  
172 combination of these two were determined using enzymatic recycling method described previously by  
173 Rahman et al <sup>26</sup>.

174 For data normalization, total protein concentration determination of the cell lysates was performed with  
175 acetone precipitation. 100 μl of cell lysate sample was heated 5 min at 95 °C and 400 μl of cold (-20 °C)

176 acetone was added. Sample was mixed and incubated 1 h at -20 °C, centrifuged at 15000g and supernatant  
177 was discarded. Pellet was resuspended to 100 mM Tris-buffer (pH; 7.5) and protein concentration was  
178 detected with Multiskan sky,  $\mu$ Drop plate. Sample purity was evaluated with 260/280 ratio values.

179

## 180 **Data analysis**

181 Statistical tests were performed using SPSS Statistics 24 software. Differences between means were  
182 calculated with Student's t-test with Bonferroni correction. P values < 0.05 were considered statistically  
183 significant. Outliers were defined from data by Grupps test, in significance level 0.05.

184

## 185 **Results and discussion**

### 186 *THP-1 macrophages as a model for C. pneumoniae persistence*

187 Despite the common use of THP-1 cells as infection hosts in studies on *C. pneumoniae* biology, no  
188 comprehensive data on *C. pneumoniae* replication or infection kinetics in these cells have been available.  
189 To evaluate the usefulness of this cell line for establishing a model for chlamydial persistence, the growth  
190 kinetics of *C. pneumoniae* in both monocytic and PMA-differentiated, macrophage-like, THP-1 cells was  
191 followed with qPCR. For comparison, epithelial HL cells hosting an active *C. pneumoniae* infection were  
192 included in the study.

193 Consistent with earlier studies reporting active and efficient replication of *C. pneumoniae* in HL cells<sup>27</sup>, our  
194 data with HL cells demonstrate a continuous increase in the number of chlamydial genome equivalents (GE)  
195 detectable since 32 h post infection (Fig. 1A). As expected, treatment with 20 nM azithromycin resulted in  
196 99 % reduction of bacterial genome copy number in these cells.

197 In monocytic THP-1 cells, the *C. pneumoniae* GE numbers decreased drastically shortly after infection and  
198 after 8 h, stayed in a low yet detectable level throughout the observation period (Fig. 1B). Azithromycin (20  
199 nM) had no detectable effect on the chlamydial genome copy numbers.

200 In contrast to monocytic cells, the GE numbers in infected THP-1 macrophages stayed in constant level until  
201 32 h post infection and increased thereafter throughout the observation time (Fig. 1C). However, *C.*  
202 *pneumoniae* replication in THP-1 macrophages was less efficient than in HL cells since the genome copy  
203 numbers in the macrophages were approximately 20-fold lower than in HL cells at 72 h post infection.  
204 Treatment with 20 nM azithromycin resulted in only 73 % reduction of GE numbers in THP-1 macrophages.

205

206 As the qPCR data indicated the presence of actively dividing population of bacterial cells in THP-1  
207 macrophages, we next evaluated whether *C. pneumoniae* is able to establish a productive infection yielding  
208 new infectious progeny in these cells.

209 Within its productive life cycle, *C. pneumoniae* infectious progeny production occurs typically 48 – 72 h post  
210 infection, involving differentiation of the newly formed bacterial cells into EBs that leave the host cell to  
211 infect neighboring cells. For detecting the production of infectious EB progenies in THP-1 macrophages,  
212 subculturing of infected THP-1 cell lysates and culture medium supernatants in HL cells was used.

213 In these experiments, production of *C. pneumoniae* EBs capable of infecting HL cells was detected in all  
214 THP-1 cell lysates and supernatants collected from 72 to 144 h post infection (Table 1), indicating a  
215 continuous, asynchronous production of infectious progeny. In general, significantly higher quantities of IFU  
216 were observed in cell lysates than in supernatant samples. A duplication in IFU amounts in supernatants  
217 and triplication in cell lysates was observed from 72 to 144 h post infection.

218 Based on these data, it was evident that THP-1 macrophages can harbor a productive *C. pneumoniae*  
219 infection. However, the limited effectiveness of azithromycin in inhibiting *C. pneumoniae* growth indicates  
220 that the infection in this cell population is refractory to this macrolide antibiotic commonly used as a golden  
221 standard for treating chlamydial infections and highlights the importance of characterizing antichlamydial  
222 compounds also in macrophage-like cells.

223

#### 224 *Schisandrin lignans as modulators of C. pneumoniae infection*

225 We have recently identified the antichlamydial activity of dibenzocyclooctadiene lignans isolated from a  
226 medicinal plant *Schisandra chinensis* against the actively replicating bacteria in respiratory epithelial cells<sup>28</sup>,  
227<sup>29</sup>. Within the validation process on the current assay, three of these lignans, schisandrin, schisandrin B and  
228 schisandrin C were evaluated for their efficacy against *C. pneumoniae* in the THP-1 macrophage model at  
229 concentrations determined based on cell viability assays (Supplementary Tables 1 and 2).

230 Impact of the schisandrin lignans on *C. pneumoniae* growth kinetics was determined in THP-1 macrophages  
231 by qPCR in various time points from 2 to 144 h post infection. Of note, azithromycin at its typically used  
232 concentration 20 nM did not have any effect against the MOI1 infection (data not shown). At 100 nM  
233 azithromycin reduced the *C. pneumoniae* genome numbers by 68 % of infection 72 h post infection and by  
234 93 % at 144 h post infection (Fig. 2), thus showing extended time kill characteristics typical to persistent  
235 infections.



236 As shown in Fig. 2, 10  $\mu$ M schisandrin B and 25  $\mu$ M schisandrin C were as effective as 100 nM azithromycin  
237 in reducing *C. pneumoniae* genome numbers at 72 h and 144 h after infection. 50  $\mu$ M schisandrin C was  
238 superior to all other samples assayed for *C. pneumoniae* genome number reduction and showed a  
239 statistically significant difference to azithromycin in this respect, with 95% reduction in bacterial genome  
240 numbers at 72 h and 99 % reduction at 144 h.

241 The effect of the schisandrin lignans on *C. pneumoniae* infectious progeny production in THP-1  
242 macrophages was also evaluated. As shown in Table 2, schisandrin B and schisandrin C decreased infectious  
243 progeny production in a statistically significant manner at 72 and 144 h. In schisandrin C treated samples  
244 (25  $\mu$ M or 50  $\mu$ M), not any characteristic inclusions were detected, only some small irregular inclusion-like  
245 structures were observed in HL monolayers inoculated with the cell lysates and none in those inoculated  
246 with supernatant samples. At 50  $\mu$ M, schisandrin did not have effect on infectious EB production, neither in  
247 cell lysates nor in supernatant samples. In contrast, at 25  $\mu$ M schisandrin treatment resulted in a  
248 statistically significant increase in infectious EB quantities detected in THP-1 cell lysates at 72 h post  
249 infection.

250

#### 251 *Role of cellular redox status in the effects of schisandrin lignans on C. pneumoniae infection*

252 As key players in innate immunity, macrophages respond to microbes and other danger signals by  
253 generating effector molecules such as reactive oxygen species (ROS) and nitric oxide (NO) intended to kill  
254 the pathogen<sup>30</sup>. As the dibenzocyclooctadiene lignans are known for their redox activities and changes in  
255 cellular redox status have also been linked to bacterial persistence, we extended the study on differential  
256 effects of schisandrin and schisandrin C on *C. pneumoniae* infection by addressing changes in cellular redox  
257 status. As shown in Fig. 3A, both MOI1 and MOI5 *C. pneumoniae* infections elevated the ROS production of  
258 the infected macrophages statistically significantly at 48 h post infection. After 72 h infection ROS levels  
259 were elevated in MOI5-infected samples. As also total cellular ATP levels were elevated in the infected  
260 samples (supplementary fig. 1) but no increase in NADPH oxidase activity was observed (data not shown),  
261 this may reflect the manipulation of host cell mitochondrial function in a manner similar to a related  
262 pathogen *C. trachomatis*<sup>31</sup>. While NADPH oxidase is considered the major source of ROS in stimulated  
263 macrophages in general, previous studies have proposed that mitochondrial ROS production also takes part  
264 in macrophage responses to bacterial invaders<sup>32</sup>. In macrophages, the mitochondrial ROS have been  
265 reported to actually contribute to chlamydial survival via mechanisms involving NLRP3 inflammasome  
266 activation<sup>33,34</sup>.

267 As the data presented in Fig. 3 confirmed the relevance of ROS within *C. pneumoniae* infection in THP-1  
268 macrophages, we evaluated the impact of schisandrin and schisandrin C in this respect. No differences in

269 basal ROS levels were observed after 4 – 48 h exposure, but after 72 h schisandrin and schisandrin C  
270 elevated ROS levels at both 25  $\mu$ M and 50  $\mu$ M concentration (Fig. 3B). The concomitant administration of  
271 schisandrin and schisandrin C with MOI5 *C. pneumoniae* infection did not change the detected ROS levels  
272 compared to a vehicle-treated control infection (Fig. 3C).

273 Earlier work on anti-persister agents has indicated that promotion of oxidative stress by increased rOS  
274 production eradicates persister bacteria and enhances bacterial killing by conventional antibiotics<sup>35, 36</sup>.  
275 Despite the impact of the lignans on macrophage basal rOS levels, ROS promotion is not likely the primary  
276 mode of action of the compounds against *C. pneumoniae*, as the infection-induced ROS levels show no  
277 difference between treated and non-treated cells. Furthermore, similar impact on basal ROS levels was  
278 observed for schisandrin and schisandrin C despite their opposite effects on *C. pneumoniae* progeny yields  
279 (Table 2).

280 The impact of *C. pneumoniae* infection and schisandrin lignans on redox status of THP-1 macrophages was  
281 further studied with determining cellular GSH concentrations after infection, lignan treatment, or the  
282 combination of these two. As shown in Fig. 4A, *C. pneumoniae* infection caused a time- and infection MOI-  
283 dependent elevation in cellular GSH levels, detectable 48 – 72 h post infection. Time-dependent fluctuation  
284 of GSH pools after chlamydial infection have also been reported by others<sup>37, 38</sup> and can be considered a  
285 homeostatic response of the host to the elevated ROS levels.

286 Our replication results show that despite the elevated ROS levels (Fig. 3A) and altering GSH levels (Fig. 4A)  
287 during infection, a significant fraction of the bacteria maintains an actively replicating phenotype. Thus, in  
288 contrast to murine macrophages<sup>17, 39</sup> oxidative stress seems not to result in purely persistent infection  
289 phenotype in THP-1 macrophages.

290 Previous work has highlighted the role of NO and inducible nitric oxide synthase (iNOS) as a trigger for  
291 chlamydial persistence in murine RAW264.7 macrophages<sup>17, 37</sup>. NO production in in PBMCs and  
292 macrophages involves, however, remarkable inter-species differences<sup>40, 41</sup> and based on data published by  
293 us and other research groups, the human THP-1 cell line produces NO neither in its monocytic nor  
294 macrophage like phenotype<sup>42-44</sup>. The lack of iNOS induction after chlamydial trigger can be speculated to  
295 enable the productive *C. pneumoniae* infection in THP-1 macrophages, yet more comprehensive picture on  
296 host cell redox status is necessary in order to draw conclusions in this respect.

297

298 The medicinal plant-derived schisandrin lignans have recently been reported to harbour pharmacological  
299 activities, such as neuro- and cytoprotective as well as anti-inflammatory properties<sup>45</sup>. A key mechanism  
300 mediating these activities is considered to be the lignans' impact on cellular redox status. The promotion of

301 redox activities is linked to their ability to modulate mitochondrial functions<sup>46, 47</sup>. In addition, our previous  
302 studies in monocytic THP-1 cells showed that the lignans affect cellular glutathione metabolism by causing  
303 a decrease in total GSH pools<sup>42</sup>. Similar to monocytic THP-1 cells, THP-1 macrophages exhibit remarkably  
304 lowered GSH pools after lignan treatment (Fig. 4B), and a drastic decrease in GSH levels was also observed  
305 in *C. pneumoniae*-infected THP-1 macrophages after lignan exposure (fig. 4C). The relevance of GSH  
306 depletion in the lignans' activities on *C. pneumoniae* was confirmed by supplementing the infected cultures  
307 with GSH ethyl ester. While administration of this cell-permeable GSH derivative alone increased EB yields  
308 by approximately 40 %, supplementation of schisandrin-treated infections yielded infectious progeny levels  
309 similar or lower than those in the infection control, indicating that the GSH supplementation eliminates the  
310 elevating effect of the 25  $\mu$ M schisandrin on bacterial progeny production.

311

312 The cellular GSH balance may affect intracellular bacteria by a variety of mechanisms. GSH has been found  
313 to act as a major cysteine source of intracellular bacteria<sup>48</sup> and it has been reported to indirectly affect  
314 chlamydial energy supply by increasing cell wall permeability<sup>49</sup>. GSH depletion is also known to induce K<sup>+</sup>  
315 efflux<sup>50</sup> which, in turn, can promote the chlamydial replication via the induction of NLRP3 inflammasome in  
316 the host cells<sup>33, 51</sup>. On the other hand, GSH and its metabolites are directly toxic to some intracellular  
317 bacteria<sup>52</sup> and the GSH-dependent changes in cellular redox status may detrimentally affect *C. pneumoniae*  
318 survival, as suggested in murine models<sup>37</sup>. Interestingly, GSH is also known to induce virulence gene  
319 expression of *Listeria monocytogenes*<sup>53</sup>, implying that it may serve as an indicator of the local  
320 environment, directing virulence gene expression of intracellular bacteria. To date, processes linked to the  
321 ability of *Chlamydia* spp. Bacteria to sense their microenvironment have remained poorly understood, and  
322 the potential role of GSH in chlamydial adaptation and balance between active and persistent phenotype  
323 warrants further investigation.

324 Despite their similar effects on cellular ROS and GSH levels, schisandrin and schisandrin C show differential  
325 activity on the *C. pneumoniae* infection in THP-1 macrophages. This may reflect two separate aspects of  
326 their biological activities: a redox-dependent phenotypic switch by *C. pneumoniae* from persister to active  
327 replication and a dual mode of antichlamydial action by schisandrin C. While schisandrin C exhibits  
328 chlamydiocidal activity in the acute infection model, schisandrin does not affect actively dividing bacteria at  
329 25  $\mu$ M concentration<sup>29</sup>. Based on these observations, we propose that depleting cellular GSH stimulates  
330 chlamydial growth, and persistent infection is converted to active state. In the case of schisandrin this is  
331 seen as the promotion of infectious progeny formation, whereas schisandrin C acts as a multimodal  
332 antibacterial agent yielding a potent eradication of macrophages by killing the bacteria it is switching  
333 towards active replication.

334 To date, only a few drug-like molecules have been described as phenotypic switchers reverting persister  
335 bacteria from dormancy to active growth<sup>2, 54, 55</sup> and to our knowledge, the schisandrin lignans represent the  
336 first phenotypic switchers described to be active on intracellular bacteria. Based on rodent bioavailability  
337 studies, micromolar plasma concentrations of the lignans can be achieved after a single oral dose<sup>56</sup>,  
338 indicating the potential of the lignans as leads for orally administered drugs. Furthermore, our in vitro cell  
339 viability data (Supplementary information,<sup>29, 42</sup> and the numerous in vivo studies on these compounds<sup>45</sup>  
340 indicate the lack of acute or subacute toxicity of the lignans.

341 To conclude, the constant increase of detected number of bacterial copy numbers and infectious progeny  
342 in our studies indicates that *C. pneumoniae* is able to establish a productive infection in THP-1 monocyte-  
343 derived macrophages. The limited potency of azithromycin in clearing the cultures from bacteria implies to  
344 the presence of an antibiotic-tolerant subpopulation of bacterial and emphasizes the importance of  
345 including nonpermissive host cell lines in chlamydial susceptibility studies. Redox status and glutathione  
346 homeostasis have recently emerged as modulators for intracellular bacteria virulence<sup>53, 57</sup>, indicating that  
347 targeting cellular redox mechanisms may offer a means for inducing a phenotypic switch in pathogenic  
348 bacteria. The superiority of schisandrin C compared to azithromycin in its ability to eliminate both active  
349 and persistent bacteria in THP-1 macrophages highlights the potential of this strategy in anti-persister  
350 therapy, triggering future research on nonconventional antibacterials.

351

## 352 Acknowledgements

353 The authors wish to thank the funding bodies for the financial support.

354

## 355 Funding statement

356 This work has been financially supported by Finnish Cultural Foundation grants to Eveliina Taavitsainen and  
357 Leena Hanski, as well as by the Faculty of Pharmacy Young Researcher Award to Leena Hanski.

358

359 Transparency declaration. The authors declare no conflicts of interest.

360

## 361 References

362

References

- 363 1. Balaban NQ, Helaine S, Lewis K et al. Definitions and guidelines for research on antibiotic  
364 persistence. *Nature Reviews Microbiology*. 2019; 1.
- 365 2. Defraigne V, Fauvart M, Michiels J. Fighting bacterial persistence: Current and emerging anti-  
366 persister strategies and therapeutics. *Drug Resist Updat*. 2018; **38**: 12-26.
- 367 3. Kuo C, Stephens RS, Bavoil PM et al. Chlamydia. *Bergey's Manual of Systematics of Archaea and*  
368 *Bacteria*. 2015; 1-28.
- 369 4. Beagley K, Huston WM, Hansbro PM et al. Chlamydial infection of immune cells: Altered  
370 function and implications for disease. *Critical Reviews™ in Immunology*. 2009; **29**: .
- 371 5. Grieshaber S, Grieshaber N, Yang H et al. The impact of active metabolism on chlamydia  
372 trachomatis elementary body transcript profile and infectivity. *J Bacteriol*. 2018; 18.
- 373 6. Panzetta ME, Valdivia R, Saka HA. Chlamydia persistence: A survival strategy to evade  
374 antimicrobial effects in-vitro and in-vivo. *Frontiers in Microbiology*. 2018; **9**: 3101.
- 375 7. Bellmann-Weiler R, Martinz V, Kurz K et al. Divergent modulation of chlamydia pneumoniae  
376 infection cycle in human monocytic and endothelial cells by iron, tryptophan availability and  
377 interferon gamma. *Immunobiology*. 2010; **215**: 842-8.
- 378 8. Krämer S, Crauwels P, Bohn R et al. AP-1 transcription factor serves as a molecular switch  
379 between chlamydia pneumoniae replication and persistence. *Infect Immun*. 2015; **83**: 2651-60.
- 380 9. Klos A, Thalmann J, Peters J et al. The transcript profile of persistent chlamydia (chlamydia)  
381 pneumoniae in vitro depends on the means by which persistence is induced. *FEMS Microbiol Lett*.  
382 2009; **291**: 120-6.

- 383 10. Ouellette SP, Hatch TP, AbdelRahman YM et al. Global transcriptional upregulation in the  
384 absence of increased translation in chlamydia during IFN $\gamma$ -mediated host cell tryptophan  
385 starvation. *Mol Microbiol.* 2006; **62**: 1387-401.
- 386 11. Grayston JT, Belland RJ, Byrne GI et al. Infection with chlamydia pneumoniae as a cause of  
387 coronary heart disease: The hypothesis is still untested. *Pathogens and Disease.* 2015; **73**: 1.
- 388 12. Webley WC, Hahn DL. Infection-mediated asthma: Etiology, mechanisms and treatment  
389 options, with focus on chlamydia pneumoniae and macrolides. *Respiratory Research.* 2017; **18**: 98.
- 390 13. Herweg J, Rudel T. Interaction of chlamydiae with human macrophages. *The FEBS Journal.*  
391 2016; **283**: 608-18.
- 392 14. Poikonen K, Lajunen T, Silvennoinen-Kassinen S et al. Susceptibility of human monocyte-  
393 macrophages to chlamydia pneumoniae infection in vitro is highly variable and associated with  
394 levels of soluble CD14 and C. pneumoniae IgA and human HSP-IgG antibodies in serum. *Scand J*  
395 *Immunol.* 2008; **67**: 279-84.
- 396 15. Wolf K, Fischer E, Hackstadt T. Degradation of chlamydia pneumoniae by peripheral blood  
397 monocytic cells. *Infect Immun.* 2005; **73**: 4560-70.
- 398 16. Rupp J, Pfeleiderer L, Jugert C et al. Chlamydia pneumoniae hides inside apoptotic neutrophils  
399 to silently infect and propagate in macrophages. *PLoS One.* 2009; **4**: e6020.
- 400 17. Azenabor AA, Chaudhry AU. Chlamydia pneumoniae survival in macrophages is regulated by  
401 free Ca<sup>2+</sup> dependent reactive nitrogen and oxygen species. *J Infect.* 2003; **46**: 120-8.

- 402 18. Haranaga S, Yamaguchi H, Ikejima H et al. Chlamydia pneumoniae infection of alveolar  
403 macrophages: A model. *J Infect Dis.* 2003; **187**: 1107-15.
- 404 19. Hanski L, Ausbacher D, Tiirola TM et al. Amphipathic  $\beta$ 2, 2-amino acid derivatives suppress  
405 infectivity and disrupt the intracellular replication cycle of chlamydia pneumoniae. *PLoS One.* 2016;  
406 **11**: e0157306.
- 407 20. Hanski LL, Kapp K, Tiirola TM et al. Mint flavorings from candies inhibit the infectivity of  
408 chlamydia pneumoniae. *Natural Product Communications.* 2016; **11**: 1934578X1601101125.
- 409 21. Kohlhoff S, Huerta N, Hammerschlag MR. In vitro activity of levonadifloxacin (WCK 771) against  
410 chlamydia pneumoniae. *Antimicrob Agents Chemother.* 2019; **19**.
- 411 22. Kohlhoff SA, Huerta N, Hammerschlag MR. In vitro activity of omadacycline against chlamydia  
412 pneumoniae. *Antimicrob Agents Chemother.* 2019; **63**: 1907.
- 413 23. Kuo CC, Grayston JT. A sensitive cell line, HL cells, for isolation and propagation of chlamydia  
414 pneumoniae strain TWAR. *J Infect Dis.* 1990; **162**: 755-8.
- 415 24. Alvesalo J, Vuorela H, Tammela P et al. Inhibitory effect of dietary phenolic compounds on  
416 chlamydia pneumoniae in cell cultures. *Biochem Pharmacol.* 2006; **71**: 735-41.
- 417 25. Tondella ML, Talkington DF, Holloway BP et al. Development and evaluation of real-time PCR-  
418 based fluorescence assays for detection of chlamydia pneumoniae. *J Clin Microbiol.* 2002; **40**: 575-  
419 83.
- 420 26. Rahman I, Kode A, Biswas SK. Assay for quantitative determination of glutathione and  
421 glutathione disulfide levels using enzymatic recycling method. *Nature Protocols.* 2006; **1**: 3159.

- 422 27. Mannonen L, Kamping E, Penttilä T et al. IFN- $\gamma$  induced persistent chlamydia pneumoniae  
423 infection in HL and mono mac 6 cells: Characterization by real-time quantitative PCR and culture.  
424 *Microb Pathog.* 2004; **36**: 41-50.
- 425 28. Hakala E, Hanski LL, Yrjönen T et al. The lignan-containing extract of schisandra chinensis  
426 berries inhibits the growth of chlamydia pneumonia. *Natural Product Communications.* 2015; **10**:  
427 1001-4.
- 428 29. Hakala E, Hanski L, Uvell H et al. Dibenzocyclooctadiene lignans from schisandra spp.  
429 selectively inhibit the growth of the intracellular bacteria chlamydia pneumoniae and chlamydia  
430 trachomatis. *J Antibiot.* 2015; **68**: 609-14.
- 431 30. Noubade R, Wong K, Ota N et al. NRROS negatively regulates reactive oxygen species during  
432 host defence and autoimmunity. *Nature.* 2014; **509**: 235.
- 433 31. Kurihara Y, Itoh R, Shimizu A et al. Chlamydia trachomatis targets mitochondrial dynamics to  
434 promote intracellular survival and proliferation. *Cell Microbiol.* 2019; **21**: e12962.
- 435 32. West AP, Brodsky IE, Rahner C et al. TLR signalling augments macrophage bactericidal activity  
436 through mitochondrial ROS. *Nature.* 2011; **472**: 476.
- 437 33. Itoh R, Murakami I, Chou B et al. Chlamydia pneumoniae harness host NLRP3 inflammasome-  
438 mediated caspase-1 activation for optimal intracellular growth in murine macrophages. *Biochem*  
439 *Biophys Res Commun.* 2014; **452**: 689-94.
- 440 34. Shimada K, Crother TR, Arditi M. Innate immune responses to chlamydia pneumoniae  
441 infection: Role of TLRs, NLRs, and the inflammasome. *Microb Infect.* 2012; **14**: 1301-7.



- 442 35. Grant SS, Kaufmann BB, Chand NS et al. Eradication of bacterial persisters with antibiotic-  
443 generated hydroxyl radicals. *Proceedings of the National Academy of Sciences*. 2012; **109**: 12147-  
444 52.
- 445 36. Sultana ST, Call DR, Beyenal H. Eradication of pseudomonas aeruginosa biofilms and persister  
446 cells using an electrochemical scaffold and enhanced antibiotic susceptibility. *NPJ Biofilms and*  
447 *Microbiomes*. 2016; **2**: 2.
- 448 37. Azenabor AA, Muili K, Akoachere J et al. Macrophage antioxidant enzymes regulate chlamydia  
449 pneumoniae chronicity: Evidence of the effect of redox balance on host–pathogen relationship.  
450 *Immunobiology*. 2006; **211**: 325-39.
- 451 38. Prusty BK, Böhme L, Bergmann B et al. Imbalanced oxidative stress causes chlamydial  
452 persistence during non-productive human herpes virus co-infection. *PloS One*. 2012; **7**: e47427.
- 453 39. Di Pietro M, Filardo S, De Santis F et al. Chlamydia pneumoniae and oxidative stress in  
454 cardiovascular disease: State of the art and prevention strategies. *International Journal of*  
455 *Molecular Sciences*. 2015; **16**: 724-35.
- 456 40. Schneemann M, Schoeden G. Macrophage biology and immunology: Man is not a mouse. *J*  
457 *Leukoc Biol*. 2007; **81**: 579.
- 458 41. Denis M. Human monocytes/macrophages: NO or no NO? *J Leukoc Biol*. 1994; **55**: 682-4.
- 459 42. Kortesoja M, Karhu E, Olafsdottir ES et al. Impact of dibenzocyclooctadiene lignans from  
460 schisandra chinensis on the redox status and activation of human innate immune system cells.  
461 *Free Radical Biology and Medicine*. 2019; **131**: 309-17.

- 462 43. Chanput W, Mes J, Vreeburg RA et al. Transcription profiles of LPS-stimulated THP-1  
463 monocytes and macrophages: A tool to study inflammation modulating effects of food-derived  
464 compounds. *Food & Function*. 2010; **1**: 254-61.
- 465 44. Daigneault M, Preston JA, Marriott HM et al. The identification of markers of macrophage  
466 differentiation in PMA-stimulated THP-1 cells and monocyte-derived macrophages. *PLoS One*.  
467 2010; **5**: e8668.
- 468 45. Szopa A, Ekiert R, Ekiert H. Current knowledge of schisandra chinensis (turcz.) baill.(chinese  
469 magnolia vine) as a medicinal plant species: A review on the bioactive components,  
470 pharmacological properties, analytical and biotechnological studies. *Phytochemistry Reviews*.  
471 2017; **16**: 195-218.
- 472 46. Chiu PY, Tang MH, Mak DH et al. Hepatoprotective mechanism of schisandrin B: Role of  
473 mitochondrial glutathione antioxidant status and heat shock proteins. *Free Radical Biology and*  
474 *Medicine*. 2003; **35**: 368-80.
- 475 47. Chiu PY, Leung HY, Ko KM. Schisandrin B enhances renal mitochondrial antioxidant status,  
476 functional and structural integrity, and protects against gentamicin-induced nephrotoxicity in rats.  
477 *Biological and Pharmaceutical Bulletin*. 2008; **31**: 602-5.
- 478 48. Alkhuder K, Meibom KL, Dubail I et al. Glutathione provides a source of cysteine essential for  
479 intracellular multiplication of francisella tularensis. *PLoS Pathogens*. 2009; **5**: e1000284.
- 480 49. Lazarev VN, Borisenko GG, Shkarupeta MM et al. The role of intracellular glutathione in the  
481 progression of chlamydia trachomatis infection. *Free Radical Biology and Medicine*. 2010; **49**:  
482 1947-55.

- 483 50. Meury J, Robin A. Glutathione-gated K channels of escherichia coli carry out K efflux controlled  
484 by the redox state of the cell. *Arch Microbiol.* 1990; **154**: 475-82.
- 485 51. Abdul-Sater AA, Koo E, Häcker G et al. Inflammasome-dependent caspase-1 activation in  
486 cervical epithelial cells stimulates growth of the intracellular pathogen chlamydia trachomatis. *J*  
487 *Biol Chem.* 2009; **284**: 26789-96.
- 488 52. Oberley-Deegan RE, Rebits BW, Weaver MR et al. An oxidative environment promotes growth  
489 of mycobacterium abscessus. *Free Radical Biology and Medicine.* 2010; **49**: 1666-73.
- 490 53. Reniere ML, Whiteley AT, Hamilton KL et al. Glutathione activates virulence gene expression of  
491 an intracellular pathogen. *Nature.* 2015; **517**: 170.
- 492 54. Kim J, Heo P, Yang T et al. Selective killing of bacterial persisters by a single chemical  
493 compound without affecting normal antibiotic-sensitive cells. *Antimicrob Agents Chemother.* 2011;  
494 **55**: 5380-3.
- 495 55. Pan J, Bahar AA, Syed H et al. Reverting antibiotic tolerance of pseudomonas aeruginosa PAO1  
496 persister cells by (Z)-4-bromo-5-(bromomethylene)-3-methylfuran-2 (5H)-one. *PLoS One.* 2012; **7**:  
497 e45778.
- 498 56. Li C, Cheng Y, Hsieh C et al. Pharmacokinetics of schizandrin and its pharmaceutical products  
499 assessed using a validated LC-MS/MS method. *Molecules.* 2018; **23**: 173.
- 500 57. Rhen M. Salmonella and reactive oxygen species: A love-hate relationship. *Journal of Innate*  
501 *Immunity.* 2019; **11**: 216-26.
- 502

503 Table 1. Quantification of infectious *C. pneumoniae* progeny EBs following an infection of THP-1  
504 macrophages.

|       | <b>cell lysate</b> | <b>supernatant</b> |
|-------|--------------------|--------------------|
|       | <b>(IFU/ml)</b>    | <b>(IFU/ml)</b>    |
| 72 h  | 44 700 ± 0         | 11 200 ± 1 100     |
| 96 h  | 57 700 ± 700       | 11 200 ± 1 100     |
| 120 h | 201 200 ± 20 900   | 18 400 ± 1 800     |
| 144 h | 330 000 ± 27 300   | 21 300 ± 4 000     |

511 Note. Data are presented as representative examples of IFU/ml values, shown as mean±SEM, n=4.  
512 Abbreviations: infectious units per ml, IFU/ml

513

514

515

516

517

518

519

520

521

522

523

524

525

526

527

528

529

530

531

532

533

534 Table 2. The Impact of schisandrin lignans on *C. pneumoniae* infectious progeny production.

|                          | Cell lysate (IFU/ml index) |                         | Supernatant (IFU/ml index) |                    |
|--------------------------|----------------------------|-------------------------|----------------------------|--------------------|
|                          | 72h                        | 144h                    | 72h                        | 144h               |
| schisandrin 25 $\mu$ M   | 1.53 $\pm$ 0.06*           | 3.11 $\pm$ 0.62         | 1.52 $\pm$ 0.33            | 2.82 $\pm$ 0.27    |
| schisandrin 50 $\mu$ M   | 2.28 $\pm$ 0.38            | 1.03 $\pm$ 0.34         | 2.56 $\pm$ 0.64            | 0.93 $\pm$ 0.18    |
| schisandrin B 10 $\mu$ M | 0.10 $\pm$ 0.03**          | 0.01 $\pm$ 0.00***      | 0.28 $\pm$ 0.18            | 0.04 $\pm$ 0.01*** |
| schisandrin C 25 $\mu$ M | 0.00 $\pm$ 0.00**          | 0.00 $\pm$ 0.00***      | 0.00 $\pm$ 0.00**          | 0.00 $\pm$ 0.00*** |
| schisandrin C 50 $\mu$ M | 0.00 $\pm$ 0.00**          | 0.00 $\pm$ 0.00***      | 0.00 $\pm$ 0.00**          | 0.00 $\pm$ 0.00*** |
| azithromycin 100nM       | 0.18 $\pm$ 0.20**          | 0.05 $\pm$ 0.03***      | 0.30 $\pm$ 0.21            | 0.00 $\pm$ 0.00*** |
| infection (IFU/ml)       | 49 700 $\pm$ 16<br>000     | 140 200 $\pm$ 22<br>800 | 5 400 $\pm$ 2 100          | 12 300 $\pm$ 700   |

535

536 Note. MOI 1 infection was used in experiments. Data are normalized on the nontreated infection control  
 537 and presented as infectious units per ml (IFU/ml) ratios, showing as mean  $\pm$  SEM. Results of non-treated  
 538 samples has presented as IFU/ml  $\pm$  SEM. < 0.05: \*; < 0.01: \*\*; < 0.001: \*\*\*, n=4. Abbreviations: infectious  
 539 units per ml, IFU/ml

540

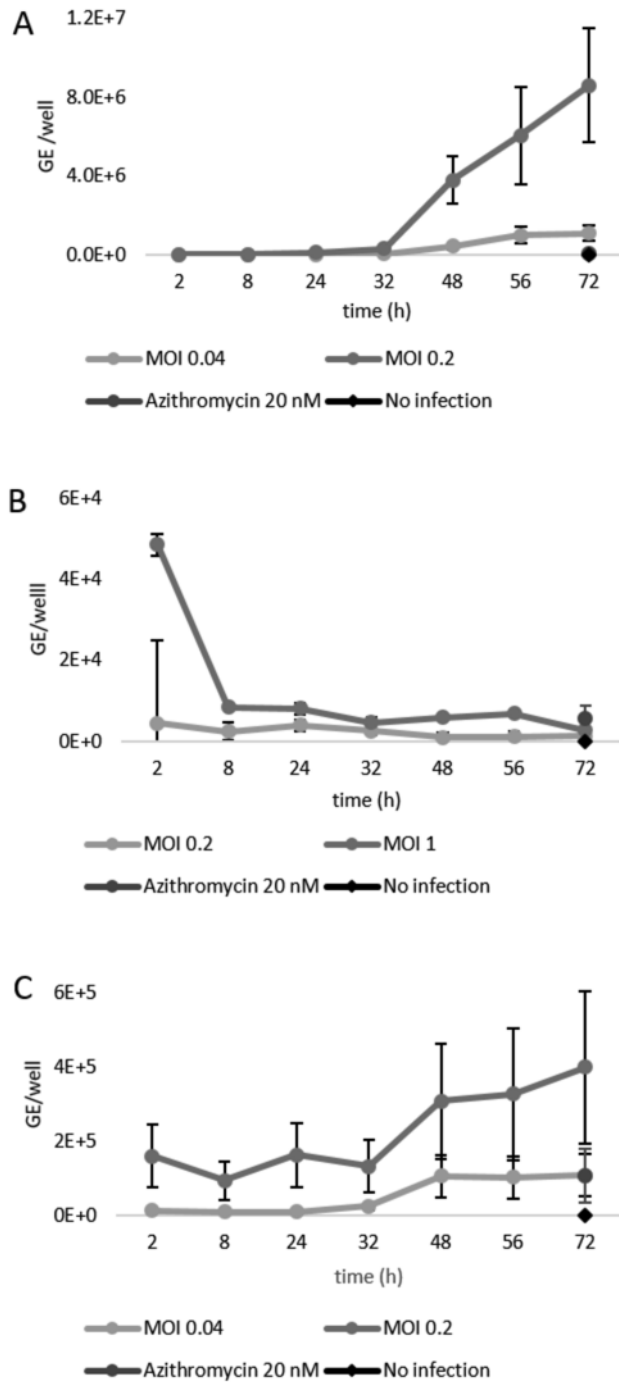

541

542 Figure 1. Growth kinetics of *C. pneumoniae* in A) HL epithelial cell B) THP-1 monocytes and C) THP-1  
543 macrophages. Cells were infected at MOI 0.04, 0.2 or 1 IFU/cell and *C. pneumoniae* genome copy numbers  
544 were determined with qPCR on *ompA* gene in seven time points. Data are presented as number of  
545 genome equivalents per well and shown as mean  $\pm$  SEM, n=4. Abbreviations: Genome equivalents, GE,  
546 multiplicity of infection, MOI

547

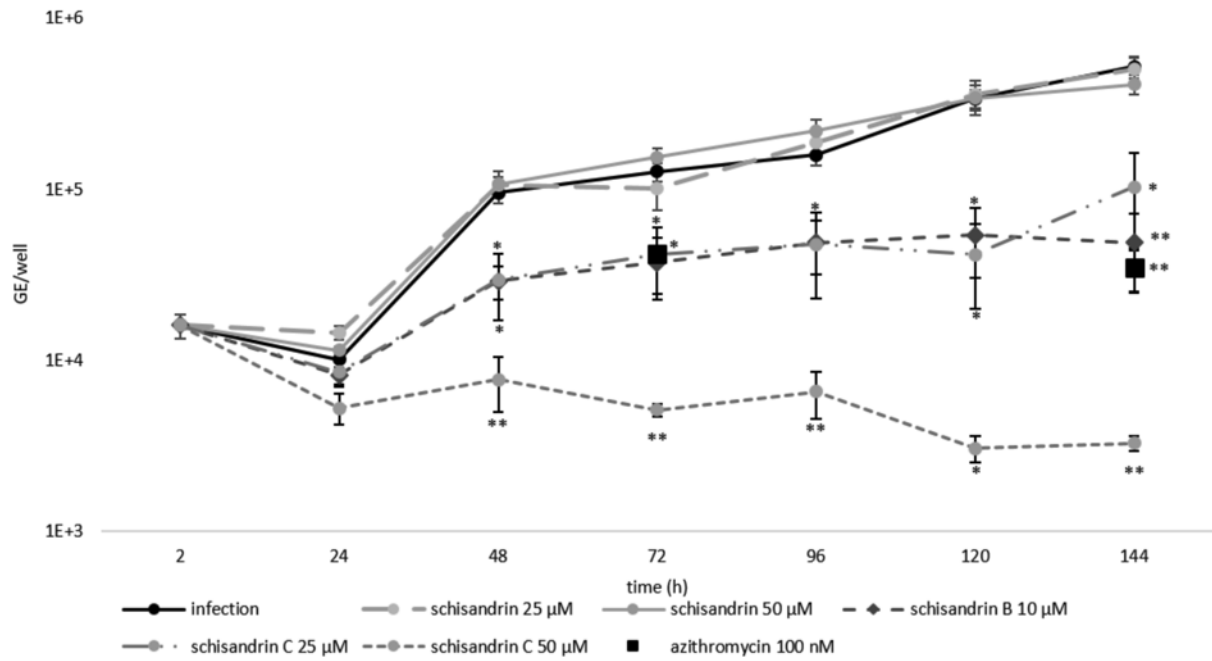

548

549 Figure 2. Impact of schisandrin lignans on *C. pneumoniae* growth kinetics in THP-1 macrophages. Cells were  
550 infected at MOI 1 IFU/cell and *C. pneumoniae* genome copy numbers were determined with qPCR on ompA  
551 gene. Fresh medium was added at 72 h. Data are shown as total genome numbers of *C. pneumoniae* per  
552 well ± SEM. Statistical significance is presented as marks of P values: < 0.05: \*; < 0.01: \*\*, < 0.001: \*\*\*,  
553 n=4. Abbreviation: Genome equivalents, GE

554

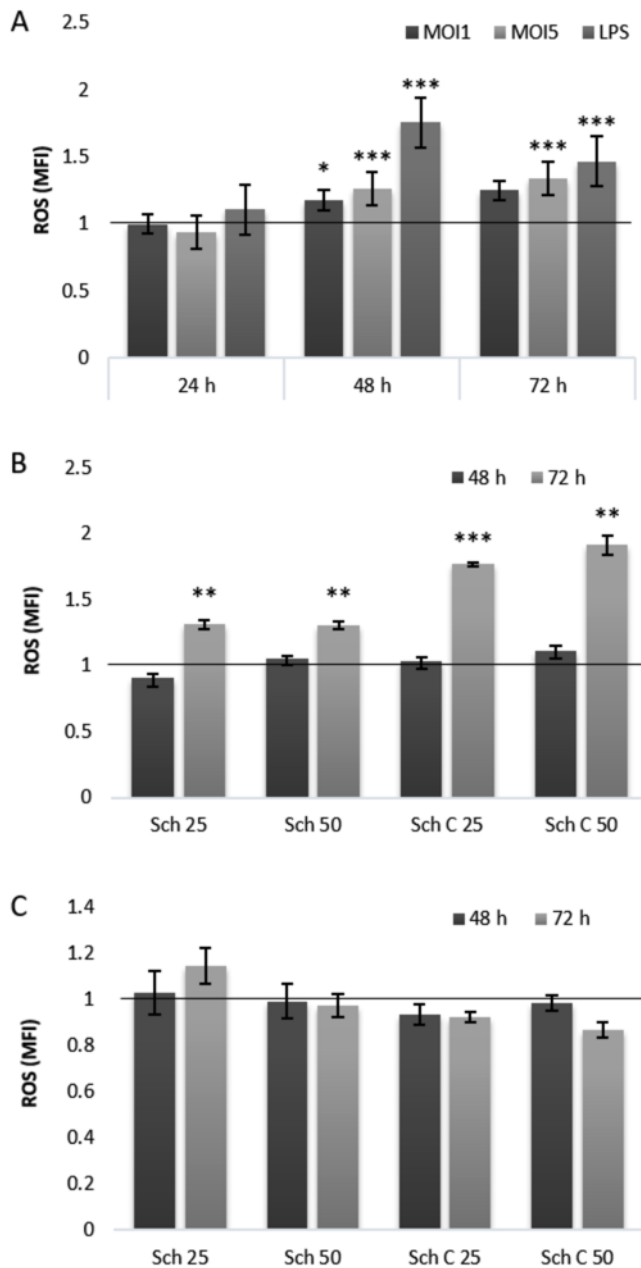

555

556 Figure 3. Impact of *C. pneumoniae* infection and schisandrin lignans on intracellular ROS production. (A)  
557 THP-1 macrophages were infected with *C. pneumoniae* at MOI1 and MOI5 or treated with 1 $\mu$ g/ml of LPS for  
558 24, 48 or 72 h. (B) THP-1 macrophages were exposed to schisandrin lignans for 48 and 72 h. (C) THP-1 cells  
559 were simultaneously infected with *C. pneumoniae* and treated with schisandrin lignans for 48 and 72 h.  
560 Intracellular ROS levels were measured after 30 min incubation with DCFH-DA and followed by 3 h  
561 incubation with PBS. Data are normalized as a ratio of 0.25 % DMSO cell control (A, B) or infection control  
562 (C) and shown as a mean  $\pm$  SEM. Statistical significance is presented as marks of P values: < 0.05: \*; < 0.01:  
563 \*\*; < 0.001: \*\*\*, n=4. Abbreviations: Reactive oxygen species, ROS; Mean fluorescence intensity, MFI;  
564 Multiplicity of infection, MOI; lipopolysaccharide, LPS; Schisandrin, Sch.



565

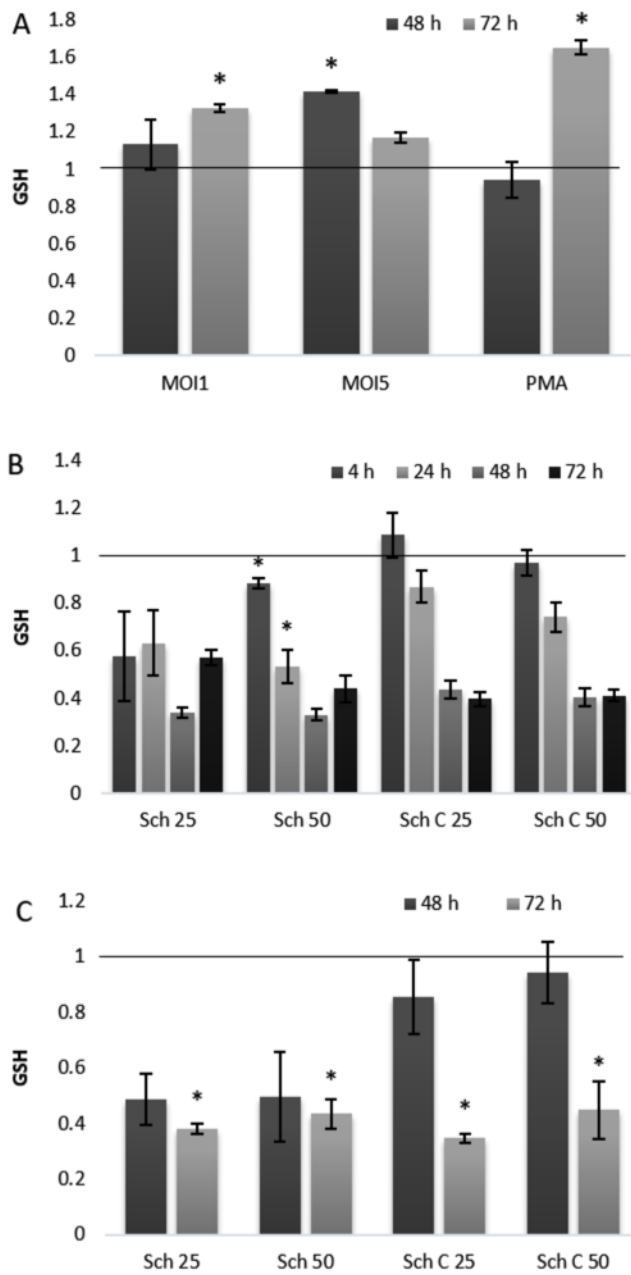

566

567 Figure 4. Effects of schisandrin lignans on total cellular GSH levels in THP-1 macrophages. (A) THP-1 cells  
568 were infected with *C. pneumoniae* at MOI1 and MOI5 for 48 and 72 h and PMA was used as control. (B)  
569 THP-1 cells were exposed to schisandra lignans for 4 to 72 h. (C) Cells were infected with MOI5 and exposed  
570 to schisandra lignans for 48 and 72 h. Total basal GSH concentrations were determined and normalized to  
571 total protein concentration of the sample. Data are shown as a ratio of 0.25 % DMSO control and shown as  
572 mean  $\pm$  SEM. Statistical significance is presented as marks of P values: < 0.05: \*; < 0.01: \*\*; < 0.001: \*\*\*.  
573 N=4. Abbreviations: Glutathione, GSH; Multiplicity of infection, MOI; phorbol-12-myristate-13-acetate,  
574 PMA; Schisandrin, Sch.
